# Supplementary figures and images for: Resolving the chromatin impact of mosaic variants with targeted Fiber-seq
Source: HighWire-hosted journal article supplement (doi:10.1101/gr.279747.124), 2024-12-01

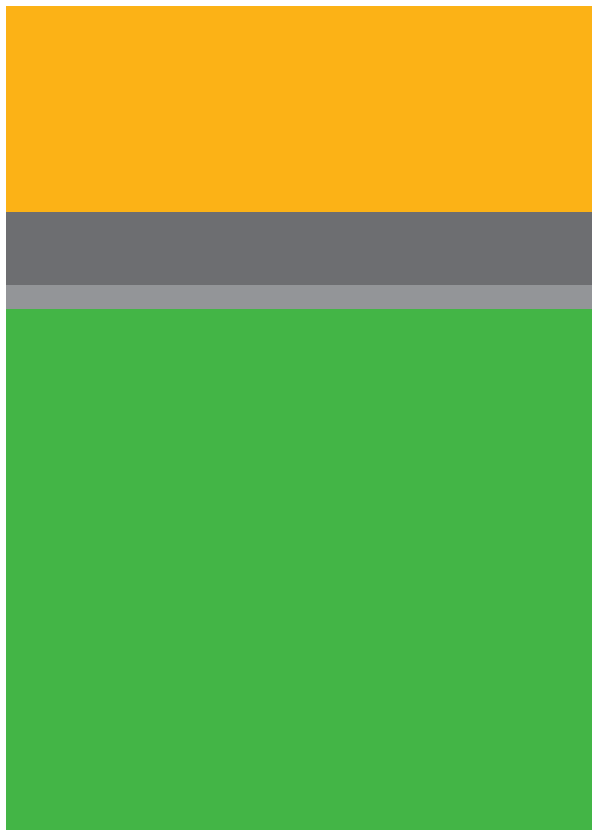

Supplement: Supplemental_Code.zip [file hbg12_coediting.pdf › Targeted-Fiber-seq-Manuscript-analyses-and-figures-main/ABE_editing/hbg12_coediting.pdf]

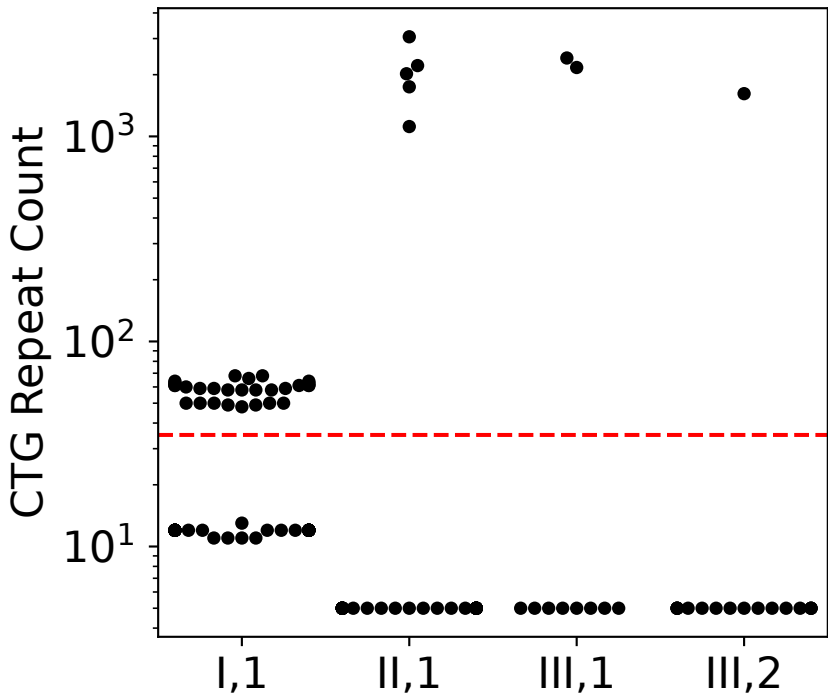

Supplement: Supplemental_Code.zip [file RE_swarm_sample.pdf › Targeted-Fiber-seq-Manuscript-analyses-and-figures-main/DM1_CAG/RE_swarm_sample.pdf]

CTG Repeat Count

$10^3$

$10^2$

$10^1$

<35

48-68

>1000

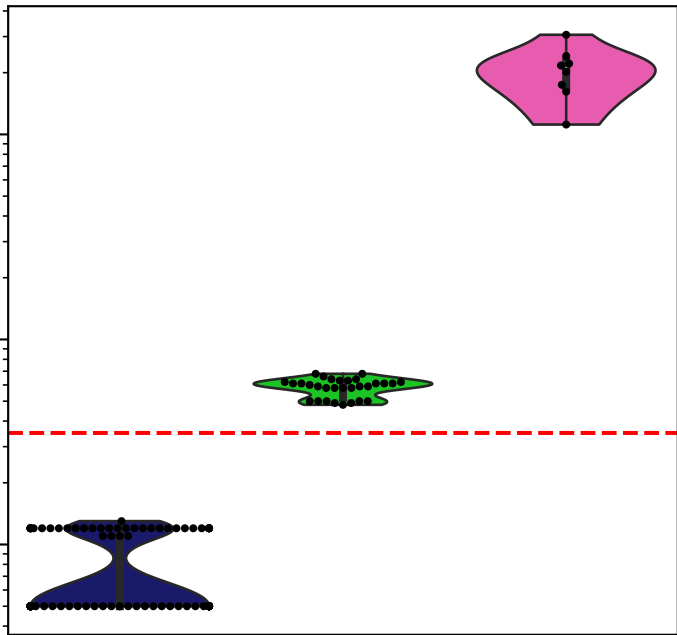

Supplement: Supplemental_Code.zip [file RE_violin_category.pdf › Targeted-Fiber-seq-Manuscript-analyses-and-figures-main/DM1_CAG/RE_violin_category.pdf]
